# Supplementary material for: Climate-forced Hg-remobilization driving mutagenesis in ferns in the aftermath of the end-Triassic extinction
Source: Research Square preprint supplement (doi:10.21203/rs.3.rs-3437107/v1), 2023-10-16
Supplement: Supplementary file 1 [file 024ff71c89cff78871840949.xlsx]

## Sheet: Table S1
Table S1: Aberrant spore and palynological data
Depth (mbs)	Total pollen	Total spores	Spore/pollen ratio	Aberrant spore (catogory I)	Aberrant spore (catogory II)	Aberrant spore (catogory III)	Aberrant spore (catogory IV)	Aberrant spore (catogory V)	Aberrant spore (catogory VI)	Spore tetrads	Spore aberrantions (% of total spores)
201	225	65	0.224138
202	240	51	0.175258
202.9	204	56	0.215385
205	234	41	0.149091	0	0	0	0	0	0	0	0
206	247	36	0.127208
207	205	59	0.223485
209	210	45	0.176471
210	211	49	0.188462	0	0	0	0	0	0	0	0
211	213	51	0.193182
213	216	48	0.181818
214	238	42	0.15
215	240	45	0.157895	0	0	0	0	0	0	0	0
217	235	51	0.178322
218	244	49	0.167235
219	231	57	0.197917
221	234	50	0.176056
223.1	159	68	0.299559
225	243	35	0.125899	0	0	0	0	0	0	0	0
227	235	51	0.178322
229	236	51	0.1777
230	239	34	0.124542	0	1	0	0	0	0	0	2.22222
231	141	138	0.494624
232	161	63	0.28125	2	2	0	0	0	0	0	7.40741
232.9	248	42	0.144828	1	0	1	0	0	0	0	4.7619
233.1	161	130	0.446735
233.9	159	134	0.457338	6	4	0	0	0	0	0	7.46269
234	98	210	0.681818
234.5	148	142	0.489655	8	6	1	2	0	0	0	12.3188
235	126	183	0.592233
235.2	147	144	0.494845	15	4	0	0	0	0	0	13.2867
235.9	164	131	0.444068	9	3	2	1	0	0	0	11.4504
236	109	182	0.62543
236.6	156	137	0.467577	20	3	1	0	0	0	1	18.3824
237	89	186	0.676364
237.3	154	139	0.474403	2	3	1	0	0	0	0	4.31655
238	131	159	0.548276
239	110	198	0.642857
239.1	139	148	0.515679	2	3	0	0	0	0	0	3.37838
240	99	113	0.533019
240.2	211	82	0.279863	0	0	0	0	0	0	0	0
241.1	213	68	0.241993	1	0	0	0	0	0	0	1.47059
241.4	165	108	0.395604
242.3	151	97	0.391129
243	242	72	0.229299	0	1	0	0	0	0	0	1.63934
244	178	91	0.33829
245	209	96	0.314754	1	1	0	0	0	0	0	2.46914
247	249	75	0.231481	0	0	0	1	0	0	0	1.31579
248	176	126	0.417219
249	234	98	0.295181	1	2	0	0	0	0	0	4.05405
250	237	90	0.275229
251	229	60	0.207612	2	0	0	0	0	0	1	4.7619
252	186	139	0.427692
253	230	78	0.253247	0	1	0	1	0	0	0	1.72414
254	111	150	0.574713	4	8	2	1	0	0	1	9.46746
255	117	166	0.586572	3	6	2	0	0	0	0	6.62651
256	134	159	0.542662
256.3	127	156	0.551237	2	8	0	0	0	0	0	6.36943
257	106	138	0.565574	9	16	2	0	1	0	0	16.6667
257.5	127	157	0.552817	6	4	2	2	2	0	0	10.1911
258.1	120	177	0.59596	4	7	1	0	1	0	0	7.87879
258.5	132	163	0.552542	5	5	1	0	0	0	0	6.74847
259	208	100	0.324675	4	2	0	0	0	0	0	5.04202
260	146	171	0.539432
261	169	107	0.387681	1	0	0	0	0	0	0	0.990099
262	190	157	0.45245
263.8	196	126	0.391304	1	2	0	0	0	0	0	2.72727
265	213	91	0.299342
265.9	214	76	0.262069	0	1	0	1	0	0	0	2.32558
267.1	165	117	0.414894
268	192	101	0.34471
268.9	229	55	0.193662	0	1	0	0	0	0	0	1.44928
270.2	191	95	0.332168	3	1	0	0	0	0	0	3.9604
271.1	223	67	0.231034	0	1	0	1	1	0	0	3.26087
272	205	156	0.432133	2	3	0	0	0	0	0	4.2735
274.1	258	78	0.232143	1	0	0	0	0	1	0	1.36986
275.1	207	78	0.273684	1	1	1	0	0	0	0	3.06122
276	229	101	0.306061
277.1	194	73	0.273408	1	2	0	0	0	0	0	4.28571
277.9	156	132	0.458333	6	3	1	0	0	0	0	7.69231
280	124	158	0.560284
282	173	163	0.485119	10	4	0	1	1	0	1	10.625
284	91	170	0.651341	8	5	1	0	1	0	0	8.72093
286	150	168	0.528302	5	5	1	0	0	0	0	8.33333
288	172	114	0.398601
290	165	95	0.365385	2	1	1	0	0	0	0	3.8835
292	181	83	0.314394
293.9	146	131	0.472924	1	2	0	0	0	0	0	2.83019
296	168	124	0.424658
298	160	150	0.483871	1	2	0	0	0	0	0	2.30769
300	131	153	0.538732	3	4	0	0	0	0	0	4.29448
302	125	176	0.584718	6	1	1	0	0	0	0	5.71429
303.3	174	117	0.402062	8	2	1	0	1	0	0	10.084
304	121	171	0.585616	8	13	2	1	2	0	1	16.4634
306	201	137	0.405325	2	8	0	0	0	0	0	6.45161
306.7	151	137	0.475694	6	1	0	0	0	0	0	5.10949
307.3	158	135	0.460751	5	2	1	1	0	0	1	7.40741
308	169	179	0.514368	9	5	0	0	0	0	0	8.48485
308.7	147	142	0.491349	9	2	3	1	0	0	0	10.5634
309.2	118	181	0.605351	19	1	2	0	1	0	0	12.7072
310	113	190	0.627063
310.4	121	154	0.56	11	4	0	0	0	0	0	9.74026
311.2	133	156	0.539792	18	3	0	1	0	0	0	14.1935
312	170	158	0.481707
312.2	158	134	0.458904	9	4	1	1	2	0	0	12.6866
312.7	145	155	0.516667	11	1	1	1	0	0	1	9.67742
313.8	191	96	0.334495	5	4	1	0	0	0	0	10.4167
314.3	166	112	0.402878	11	2	0	1	0	0	0	11.3821
315.1	171	124	0.420339	1	2	0	0	0	0	0	2.4
315.9	159	126	0.442105	8	2	2	0	0	0	0	9.52381
316.4	173	119	0.407534	23	1	2	1	3	0	1	24.2188
316.7	168	131	0.438127	18	3	3	0	4	0	0	19.5804
317.1	215	93	0.301948	5	0	0	0	0	0	0	6.84932
317.5	143	160	0.528053	42	5	1	2	3	0	0	29.2818
317.9	239	52	0.178694	4	2	1	1	0	0	0	11.1111
318.2	115	5	0.0416667
318.4	100	15	0.130435
318.6	151	57	0.274038	8	1	0	0	0	0	0	15.7895
319.1	87	201	0.697917	4	1	0	0	0	0	0	2.51256
319.5	34	240	0.875912	12	2	1	0	0	0	1	7.33945
319.66	10	148	0.936709
319.8	3	111	0.973684
320.2	1	103	0.990385	2	2	0	0	0	0	0	3.14961
320.8	2	46	0.958333
321.1	10	62	0.861111
321.5	10	107	0.91453	2	1	0	0	0	0	0	1.75439
322	43	144	0.770053
322.5	12	154	0.927711	4	1	0	0	0	0	0	2.7027
322.7	86	187	0.684982
323.1	34	187	0.846154
323.4	46	142	0.755319	0	1	0	0	0	0	0	0.8
324.1	50	150	0.75
325	20	85	0.809524	1	0	1	0	0	0	0	1.48148
325.5	36	188	0.839286
326.5	14	114	0.890625	3	2	0	0	0	0	0	3.14465
327.3	56	259	0.822222	9	2	0	0	0	0	3	7.6087
327.8	10	93	0.902913
328.5	53	262	0.831746	7	4	2	2	0	0	0	8.57143
329.5	91	212	0.69967	12	2	0	0	1	0	0	9.55414
329.8	38	179	0.824885
331	133	151	0.53169	5	4	2	3	2	0	1	11.2583
331.6	120	134	0.527559
332.1	116	163	0.584229	5	2	0	0	0	0	0	6.25
332.5	138	71	0.339713
333	149	121	0.448148
333.2	226	51	0.184116	1	0	0	0	0	0	1	4.65116
333.5	60	134	0.690722
334	173	89	0.339695
334.6	174	65	0.271967	3	1	0	0	0	0	0	6.25
335	103	180	0.636042
335.3	83	204	0.710801
335.5	69	142	0.672986	2	5	1	0	0	0	0	4.14508
335.8	56	143	0.718593
336	141	154	0.522034
336.2	50	138	0.734043
336.5	70	132	0.653465
336.8	111	260	0.700809	6	1	2	0	0	0	0	6.04027
337.2	135	153	0.53125
337.5	152	128	0.457143
337.7	89	216	0.708197
338	88	199	0.69338	9	1	0	0	0	0	0	5.55556
