# Supplementary material for: Climate-forced Hg-remobilization driving mutagenesis in ferns in the aftermath of the end-Triassic extinction
Source: Research Square preprint supplement (doi:10.21203/rs.3.rs-3437107/v1), 2023-10-16
Supplement: Supplementary file 2 [file 13c2370caa7f9eee99d0b321.xlsx]

## Sheet: Table S2
Table S2: Organic carbon isotopes, concentration and characterization
Depth (mbs)	TOC (wt%)	δ13C organic (‰, VPDB)	Hydrogen Index (mgHC/gTOC)	Oxygen Index (mgCO2/gTOC)
200	0.838512	-24.9342
201	0.944626	-25.0646
202	0.843989	-25.0935
203	0.835347	-25.2396
204	0.869985	-25.8694
205	0.889137	-24.9758
205	0.9043	-24.9758
206	0.844994	-25.5044
207	0.809669	-25.4298
208	0.752042	-24.975
210	0.804637	-25.0185
211	0.758487	-24.9862
211	0.750537	-24.9862
212	0.94418	-25.0292
212	0.942122	-25.0292
213	0.750079	-24.9383
213	0.705112	-24.9383
214	0.994854	-24.3636
216	0.960004	-24.41
216.5	0.819482	-24.987
217	0.824708	-25.31
217.5	0.994596	-25.531
218.1	0.887882
218.5	0.764715	-25.618
219	0.784243	-25.44
219.5	0.827736	-25.105
220	0.790405	-24.89
220.5	0.796255	-25.073
221	0.824882	-24.775
221.5	0.858187	-25.139
222	0.958373	-24.77
222.5	0.828299	-25.249
222.9	0.963756	-25.563
223.5	1.63041	-26.916
224	1.63889	-26.84
224.5	1.45146	-26.864
225	1.55054	-26.86
225.5	1.36872	-26.947
225.6	1.42928	-26.767
226	1.08228	-26.1
226.5	1.44484	-26.297
226.6	0.92648	-26.38
227	1.14675	-26.21
227.5	1.13692	-26.175
227.6	1.11726	-26.226
228	1.09459	-26.23
228.4	1.11832	-26.148
228.5	1.17017	-26.354
229	0.964991	-26.22
229.5	1.16035	-26.253
230	1.19764	-26.3	59	64
230.5	0.238119	-25.524
231	0.301286	-25.145
231.5	0.115443	-26.64	16	226
232	0.126707	-26.345
232.5	0.404957	-26.379
233	0.336664	-26.175
233.5	0.310774	-26.043	28	192
234	0.341304	-25.13
234.5	0.340654	-25.874	20	159
235	0.129739	-24.95
235.5	0.33491	-25.755
236	0.308228	-25.04	20	116
236.5	0.312964	-25.727
237	0.276631	-24.74
237.5	0.370515	-25.842	17	93
238	0.259931	-25.7133
238.5	0.294301	-25.869
239.1	0.282278	-25.289	20	159
239.5	0.340677	-25.68
240	0.259701	-25.9
240.5	0.288495	-26.588	22	88
241	0.164529	-26.875
241.5	0.82336	-26.43
242	0.222473	-26.56	49	126
242.5	0.929975	-26.589
243	0.641128	-26.21
243.5	0.807972	-26.723	60	131
244.1	0.0558226	-27.16
244.5	0.781321	-26.593
245	0.826274	-26.49
245.5	0.634664	-26.487	49	240
246	0.931929	-26.24
246.5	0.529721	-26.728	19	210
247	0.238362
247.5	0.39664	-26.64
248	1.00401	-26.43	57	128
248.5	0.828613	-26.61
249	0.656153	-26.16
249.5	0.729201	-26.61	40	130
250	0.558957	-26.27
250.5	0.746751	-26.38	29	72
251	0.131484	-25.68
251.5	0.409	-26.542
252	0.670211	-26.1
252.5	0.222434	-26.409	36	81
253	0.722659	-25.99
253.5	0.807062	-26.478	37	108
254	0.296281	-24.26
254.5	0.658069	-26.451
255	0.280535	-24.34
255.5	0.316115	-25.787	14	120
256	0.365089	-24.6
256.5	0.350416	-25.733
257	0.0990605	-25.55
257.5	0.305014	-25.633	14	147
258	0.275271	-24.86
258.5	0.247142	-25.581	19	192
259	0.758497	-26.23
259.5	0.26866	-27.334
260	0.776038	-26.21	33	54
260.5	0.866257	-26.354
261	0.740319	-25.98
261.5	0.464257	-26.611
262	0.68977	-26.18
262.5	1.08818	-26.448
263	0.658802	-26.12
263.5	0.419083	-26.656
264	0.102397	-26.13
264.5	0.391081	-26.793
265	0.716107	-26.39
265.5	0.419871	-26.9
266	0.554926	-26.6	30	65
266.5	0.0308678	-25.8
267	0.194179	-26.3
267.5	0.885475	-26.6
268	0.635646	-26.3
268.5	0.380576	-26.9
269	0.0213752	-26.6
269.5	0.532979	-26.4
270	0.361138	-26.4	27	74
270.5	0.458147	-26.5
271.5	0.545032	-26.5
272	0.580533	-27.2
272.5	0.315394	-26.6
273	0.0392041	-26.3
273.5	0.954064	-26.3
274	0.0517132	-26
274.5	0.722168	-26.5
275	0.711303	-26.6	27	56
275.5	0.459577	-26.8
276	0.765088	-26.7
276.5	0.613817	-26.9
277	0.405147	-26.8
277.5	0.454545	-26.8
278	0.424585	-26.9
278.5	0.196782	-26.8
279	0.786159	-26.5
279.5	0.362386	-26.4
280	0.441086	-26.3	28	183
280.5	0.4352	-26.4
281	0.493972	-26.4
281.5	0.501188	-26.4
282	0.536723	-26.3
282.5	0.556065	-26.4
283.1	0.457307	-26.1
283.5	0.465213	-26.5
284	0.488122	-26.4
284.5	0.437917	-26.5
285	0.448451	-26.5
285.5	0.422866	-26.1
286	0.417941	-26.1	18	77
286.6	0.402511	-26.185
287	0.48154	-26.9
287.5	0.570553	-26.7
288	0.635899	-26.8
288.5	0.707581	-26.6
289	0.669046	-26.8
289.5	0.56688	-26.7
290	0.688743	-26.7	32	61
290.5	0.626926
291	0.574973	-26.7
291.5	0.443383	-26.4
292	0.0814678	-26.7
292.5	0.0639482	-26.2
293.1	0.328104	-26.6
293.5	0.512749	-27.9
294	0.382536	-26.7
294.5	0.666775	-26.8
295	0.538781	-26.6
295.5	0.491728	-26.6	27	88
296	0.649558	-26.7
296.5	0.360883	-26.7
297	0.469277	-26.9
297.5	0.324523	-26.7
298	0.493534	-26.1
298.5	0.549866	-26.2
299	0.245794	-25.02
299.5	0.463972		30	114
300	0.429086	-25.95
300.5	0.391172	-25.96	28	99
301	0.453027	-25.98
301.5	0.464986	-25.88
302	0.391867	-25.875	22	108
302.5	0.444473	-25.88
303	0.4461	-26.03
303.5	0.473045	-25.98	33	157
304	0.402646	-25.98
304.5	0.410138	-25.85
305	0.425809	-25.85	28	97
305.5	0.410892	-25.93
306	0.455987	-26.43
306.5	0.407404	-26.06	28	69
307	0.387435	-25.91
307.5	0.471031	-25.97
308	0.532913	-25.93	28	110
308.5	0.521777	-26.07
309	0.51851	-26.06
309.5	0.558465	-25.94	35	87
310	0.432481	-26.07
310.5	0.438039	-25.94
311	0.419142	-26.03	39	84
311.4	0.415306
312	0.407512
312.4	0.429685		31	102
313	0.518356	-27.3
313.4	0.441118
314	0.431949	-26.62	41	91
314.4	0.39943
314.5	0.32	-26.25
315	0.443155	-27.13
315.5	0.496887	-27.48	40	87
316	0.290821	-26.17
316.5	0.282669
316.6	0.300413
316.7	0.633
317	0.364106	-26.52	33	86
317.1	0.472
317.5	0.279912	-25.26
317.7	1.05
317.8	0.966093
318	1.4473	-28.995
318.1	1.25
318.2	0.739
318.5	0.79548	-29.21	181	46
318.8	0.344
319	0.140153
319.2	0.163
319.5	0.184771	-24.4
319.8	0.182
320	0.123519	-24.24	14	118
320.5	0.123023	-24.37
320.7	0.149
320.8	0.294
321	0.0656306	-24.495
321.3	0.212
321.5	0.128909	-24.28	16	351
322	0.256466	-24.34
322.2	0.243
322.3	0.236
322.5	0.12329	-24.38
322.9	0.423
323	0.131071	-24.23	18	159
323.3	0.378
323.4	0.361
323.5	0.434562	-24.14
324	0.350212	-24.25
324.1	0.313
324.4	0.256742		30	121
325	0.25249	-24.28
325.1	0.335
325.5	0.208252	-24.295
325.7	0.33
326	0.820921	-24.21	18	129
326.4	0.43479
327	0.357359	-24.26
327.1	0.519
327.4	0.481
327.5	0.514834	-24.175	15	77
327.8	0.533
328	0.477868	-23.965
328.3	0.425
328.5	0.389575	-24.06
328.7	0.39
329	0.438501	-24.215	31	64
329.6	0.53814
329.7	0.511
330	0.304658	-24.21
330.5	0.708	-24.31	23	68
330.6	0.989037
330.8	1.2
331	0.33431	-24.2
331.1	0.692
331.5	0.0980892	-24.58
331.7	0.923
332	0.688239	-24.28	27	66
332.1	0.69
332.4	0.166791
332.5	0.946	-24.33
333	0.25504	-24.71
333.5	0.0402422	-25.055	27	206
334	4.1595	-25.27
334.5	0.22509	-25.02	32	134
334.8	3.96
335	0.831562	-24.39
335.4	0.328009
335.6	0.635
336	0.549997	-24.2
336.1	0.617
336.5	0.732451	-24.35	33	56
336.8	0.846
337	0.668558	-24.22
337.5	0.706542	-24.56
338	0.715604	-24.19	24	49
