# Supplementary material for: Climate-forced Hg-remobilization driving mutagenesis in ferns in the aftermath of the end-Triassic extinction
Source: Research Square preprint supplement (doi:10.21203/rs.3.rs-3437107/v1), 2023-10-16
Supplement: Supplementary file 3 [file 3ce48fcbdf6ac5d46e75bd7d.xlsx]

## Sheet: Table S3
Table S3: Bulk mercury concentrations
Depth (mbs)	Hg (ppb)	TOC (wt%)	Hg/TOC (ppb/wt%)
205.2	38.4
214.1	20.2
216.5	20.6828	0.819482	25.2389
218.5	23.7211	0.764715	31.0195
220.5	16.9617	0.796255	21.3018
221.1	19.5
222.5	29.9662	0.828299	36.178
224.5	28.1236	1.45146	19.3761
226.5	74.1755	1.44484	51.3383
228.5	35.5716	1.17017	30.3987
230	31.1	1.19764	25.9678
231.5	7.35	0.115443	63.6676
233.5	7.66	0.310774	24.6482
234.5	30.95	0.340654	90.8547
234.6	23.9
236	46.92	0.308228	152.225
236.7	17.3		50.1449
237.5	44	0.370515	118.754
238.4	31.1
238.8	37.4
239.1	92.98	0.282278	329.392
240.5	9.24	0.288495	32.0283
242	7.84	0.222473	35.2402
243.5	37.57	0.807972	46.4991
245.5	18.58	0.634664	29.2753
246.5	26.06	0.529721	49.1957
248	29.83	1.00401	29.7108
249.5	15.15	0.729201	20.7762
250.5	29.94	0.746751	40.0937
252.5	25.82	0.222434	116.079
253.5	33	0.807062	40.8891
255.5	71.42	0.316115	225.93
256.5	25
257.4	37.5
257.5	36.55	0.305014	119.83
257.8	19.8		68.2759
258.2	45
258.5	81.82	0.247142	331.065
260	34.2	0.776038	44.07
264	23.5706	0.102397	230.189
266	35.46	0.554926	63.9004
268	17.4173	0.635646	27.401
270	14.39	0.361138	39.8463
270.2	16
272	30.8074	0.580533	53.0675
275	26.2	0.711303	36.8338
278	12.572	0.424585	29.61
280	48.09	0.441086	109.026
280.9	24
282	20.3157	0.536723	37.8514
282.1	24.4
284	21.1688	0.488122	43.3678
284.1	24.1
286	38.93	0.417941	93.1472
288	27.7921	0.635899	43.7052
290	25.02	0.688743	36.327
292	6.59935	0.0814678	81.0056
294	27.1345	0.382536	70.933
295.5	27.98	0.491728	56.9014
298	12.1696	0.493534	24.6581
299.5	19.15	0.463972	41.274
300	27.335	0.429086	63.7051
300.5	43.26	0.391172	110.591
301.5	7.42279	0.464986	15.9635
301.8	11.1		24.1304
302	10.7	0.391867	27.3052
302.2	17.8
302.9	5.8
303.5	8.59	0.473045	18.1589
305	37.08	0.425809	87.0812
306.5	38.39	0.407404	94.2307
307.5	81.1605	0.471031	172.304
308	37.98	0.532913	71.2687
308.5	18.8606	0.521777	36.1469
309.5	34.21	0.558465	61.2571
310.5	27.2462	0.438039	62.2005
311	24.86	0.419142	59.3117
312.4	19.69	0.429685	45.8243
314	26.73	0.431949	61.8823
314.5	26.9854	0.32	84.3295
315.5	77.79	0.496887	156.555
316	21.4633	0.290821	73.8027
316.1	21.4
316.5	27.8374	0.282669	98.4807
316.6	35.6774	0.300413	118.761
317	112.64	0.364106	309.36
317.5	20.8684	0.279912	74.5536
317.6	57.1
317.7	85.3518	1.05	81.2875
317.8	143.814	0.966093	148.862
318.1	50.533	1.25	40.4264
318.5	38.66	0.79548	48.5996
319.5	4.83686	0.184771	26.1776
320	4.55	0.123519	36.8364
320.5	4.68644	0.123023	38.0939
321.3	3.62063	0.212	17.0784
321.5	15.2	0.128909	117.913
322.2	7.95557	0.243	32.739
322.3	5.62566	0.236	23.8375
322.5	4.26048	0.12329	34.5565
322.9	17.5076	0.423	41.389
323	7.22	0.131071	55.0846
323.5	4.02855	0.434562	9.27039
324.4	8.55	0.256742	33.3019
325.5	4.41589	0.208252	21.2046
325.7	102.572	0.33	310.823
326	11.25	0.820921	13.7041
327.1	9.74668	0.519	18.7797
327.5	29.25	0.514834	56.8145
328.5	48.2969	0.389575	123.973
328.7	7.997	0.39	20.5051
329	17.34	0.438501	39.5438
329.6	15.1538	0.53814	28.1597
330	7.62817	0.304658	25.0384
330.5	29.06	0.708	41.0452
330.6	16.7422	0.989037	16.9277
331.5	5.73946	0.0980892	58.5127
332	40.08	0.688239	58.2356
332.5	8.48121	0.946	8.96534
333.5	3.72	0.0402422	92.4403
334	249.946	4.1595	60.0905
334.5	22.56	0.22509	100.227
334.8	150.444	3.96	37.9908
336	18.3461	0.549997	33.3567
336.5	49.2	0.732451	67.1718
336.8	67.709	0.846	80.0343
337	10.1032	0.668558	15.112
337.5	3.82429	0.706542	5.41268
338	82.45	0.715604	115.217
