# Supplementary material for: Climate-forced Hg-remobilization driving mutagenesis in ferns in the aftermath of the end-Triassic extinction
Source: Research Square preprint supplement (doi:10.21203/rs.3.rs-3437107/v1), 2023-10-16
Supplement: Supplementary file 4 [file 96d4fa417747eaeea060bdd7.xlsx]

## Sheet: Table S4
Table S4: Mercury isotopes data
Depth (mbs)	δ202Hg (‰)	2σ	δ201Hg (‰)	2σ	δ200Hg (‰)	2σ	δ199Hg (‰)	2σ	Δ201Hg (‰)	2σ	Δ200Hg (‰)	2σ	Δ199Hg (‰)	2σ
205.2	-1.23	0.0543168	-1.60229	0.077706	-0.79787	0.0221698	-0.798342	0.0039457	-0.2	0.0369185	0.0127413	0.00514533	-0.16	0.0176588
214.1	-1.2762	0.08	-1.88812	0.07	-0.981574	0.05	-0.848356	0.05	-0.292905	0.03	0.0193043	0.03	-0.237384	0.04
221.1	-1.24482	0.0679012	-1.32496	0.0954884	-0.610273	0.0808086	-0.768488	0.107328	-0.297754	0.0444903	0.0104355	0.0467022	-0.27923	0.0902783
231.5	-1.44	0.08	-1.32987	0.07	-0.663836	0.05	-0.690973	0.05	-0.18	0.03	-0.0134238	0.03	-0.14	0.04
234.6	-0.925276	0.08	-1.52845	0.07	-0.803123	0.05	-0.713529	0.05	-0.149365	0.03	-0.00170369	0.03	-0.130577	0.04
236	-0.844226	0.08	-1.15054	0.07	-0.566141	0.05	-0.663012	0.05	-0.192441	0.03	-0.0196849	0.03	-0.188455	0.04
238.8	-1.23896	0.0156034	-1.26734	0.019594	-0.704225	0.024448	-0.57795	0.0507125	-0.162799	0.00786878	-0.00816972	0.0166152	-0.155816	0.0468043
243.5	-1.32	0.08	-1.5051	0.07	-0.851425	0.05	-0.565063	0.05	-0.24	0.03	0.0173652	0.03	-0.23	0.04
246.5	-1.92	0.08	-1.39898	0.07	-0.825892	0.05	-0.577529	0.05	-0.17	0.03	-0.000520101	0.03	-0.14	0.04
249.5	-1.11	0.08	-1.08432	0.07	-0.633715	0.05	-0.486253	0.05	-0.24	0.03	-0.00735057	0.03	-0.25	0.04
255.5	-1.03893	0.08	-1.14554	0.07	-0.654014	0.05	-0.532141	0.05	-0.15202	0.03	0.0113765	0.03	-0.186824	0.04
256.5	-1.22898	0.08	-0.909892	0.07	-0.524002	0.05	-0.427015	0.05	-0.177109	0.03	-0.0149053	0.03	-0.17482	0.04
257.4	-1.2	0.08	-1.45091	0.07	-0.770482	0.05	-0.65856	0.05	-0.18	0.03	0.00135725	0.03	-0.2	0.04
258.2	-1.10216	0.0296379	-1.05041	0.0443346	-0.601581	0.0358644	-0.420894	0.0153641	-0.155981	0.0220664	0.0103298	0.0209777	-0.191581	0.00789272
258.5	-1.14161	0.08	-0.946749	0.07	-0.502416	0.05	-0.3811	0.05	-0.200915	0.03	0.0256332	0.03	-0.174138	0.04
266	-1.73	0.08	-1.11397	0.07	-0.652392	0.05	-0.485112	0.05	-0.24	0.03	0.00124558	0.03	-0.2	0.04
270.2	-1.79	0.08	-1.60606	0.07	-0.893435	0.05	-0.692721	0.05	-0.26	0.03	0.00479514	0.03	-0.24	0.04
280	-1.30061	0.08	-1.54182	0.07	-0.892369	0.05	-0.640414	0.05	-0.135897	0.03	-0.0214105	0.03	-0.157264	0.04
282.1	-1.05	0.0234067	-1.05934	0.039433	-0.571539	0.0333202	-0.461882	0.0220042	-0.16	0.0218528	0.00217203	0.0215662	-0.12	0.0161092
286	-1.21759	0.0137329	-0.984777	0.0256858	-0.554684	0.0260541	-0.469369	0.0126911	-0.134772	0.0153726	-0.000807437	0.0191615	-0.113962	0.00923257
295.5	-1.53571	0.08	-1.08219	0.07	-0.627084	0.05	-0.501071	0.05	-0.296215	0.03	-0.0264606	0.03	-0.27148	0.04
302.2	-1.01309	0.08	-1.10126	0.07	-0.612824	0.05	-0.484595	0.05	-0.148076	0.03	0.00480567	0.03	-0.171678	0.04
306.5	-1.32397	0.08	-0.933263	0.07	-0.503824	0.05	-0.448668	0.05	-0.149911	0.03	0.0182766	0.03	-0.19842	0.04
309.5	-1.24637	0.0372775	-1.05289	0.0423291	-0.535185	0.0156168	-0.54002	0.0270499	-0.147054	0.0143103	0.0134397	0.00312351	-0.17209	0.0364687
315.5	-1.64219	0.08	-1.69231	0.07	-1.01029	0.05	-0.610258	0.05	-0.164018	0.03	0.0094717	0.03	-0.163525	0.04
316.5	-1.72851	0.08	-1.22884	0.07	-0.646287	0.05	-0.565134	0.05	-0.20527	0.03	0.0148956	0.03	-0.129262	0.04
317.6	-1.38499	0.0146445	-1.09448	0.0120816	-0.613958	0.00316292	-0.468119	0.00105252	-0.225903	0.00106851	0.00869383	0.00420168	-0.228857	0.00474801
318.5	-1.08742	0.08	-0.827225	0.07	-0.42247	0.05	-0.401209	0.05	-0.333019	0.03	0.00175969	0.03	-0.389053	0.04
321.5	-1.59455	0.0516688	-0.845137	0.0654862	-0.444275	0.0636251	-0.363788	0.0250759	-0.329556	0.0266507	0.0206996	0.0376709	-0.311636	0.0120524
324.4	-1.29	0.08	-1.22711	0.07	-0.664264	0.05	-0.488826	0.05	-0.36	0.03	0.0411401	0.03	-0.36	0.04
329	-1.24	0.08	-1.23368	0.07	-0.64221	0.05	-0.592943	0.05	-0.42	0.03	-0.0166304	0.03	-0.5	0.04
332	-1.99117	0.08	-1.25244	0.07	-0.659016	0.05	-0.559036	0.05	-0.391058	0.03	-0.0176592	0.03	-0.346441	0.04
338	-1.61281	0.08	-1.07013	0.07	-0.586491	0.05	-0.438152	0.05	-0.389765	0.03	0.0127479	0.03	-0.391904	0.04
