# Supplementary material for: Climate-forced Hg-remobilization driving mutagenesis in ferns in the aftermath of the end-Triassic extinction
Source: Research Square preprint supplement (doi:10.21203/rs.3.rs-3437107/v1), 2023-10-16
Supplement: Supplementary file 5 [file f9d06294af584506fe4d887b.xlsx]

## Sheet: Table S5
Table S5: Mercury isotope standard reference materials recoveries
Sample ID	n	Recovery	δ199Hg (‰)	2σ	δ200Hg (‰)	2σ	δ201Hg (‰)	2σ	δ202Hg (‰)	2σ	Δ199Hg (‰)	2σ	Δ200Hg (‰)	2σ	Δ201Hg (‰)	2σ
GBW 07311	2	1.03	-0.405	0.03	-0.29	0.04	-0.655	0.01	-0.545	0.05	-0.27	0.04	-0.015	0.07	-0.235	0.03
Column NIST 3133	3	1.01	0	0.04	-0.01	0.02	0	0.04	0.01	0.05	0	0.03	-0.01	0.04	0	0.01
Digest NIST 3133	1	1.08	0.02		-0.02		0		-0.02		0.02		-0.01		0.01
Note: 2σ is either 2SE of replicates of each sample, or 2SD of NIST 8610, whichever is higher.
